# Supplementary material
Source: Springer Nature journal article supplement (https://www.springermedizin.de/resource/supplementary/12891_2012_1452_MOESM1_ESM.pdf/9508018)
Supplement: MOESM1 [file 9508018]

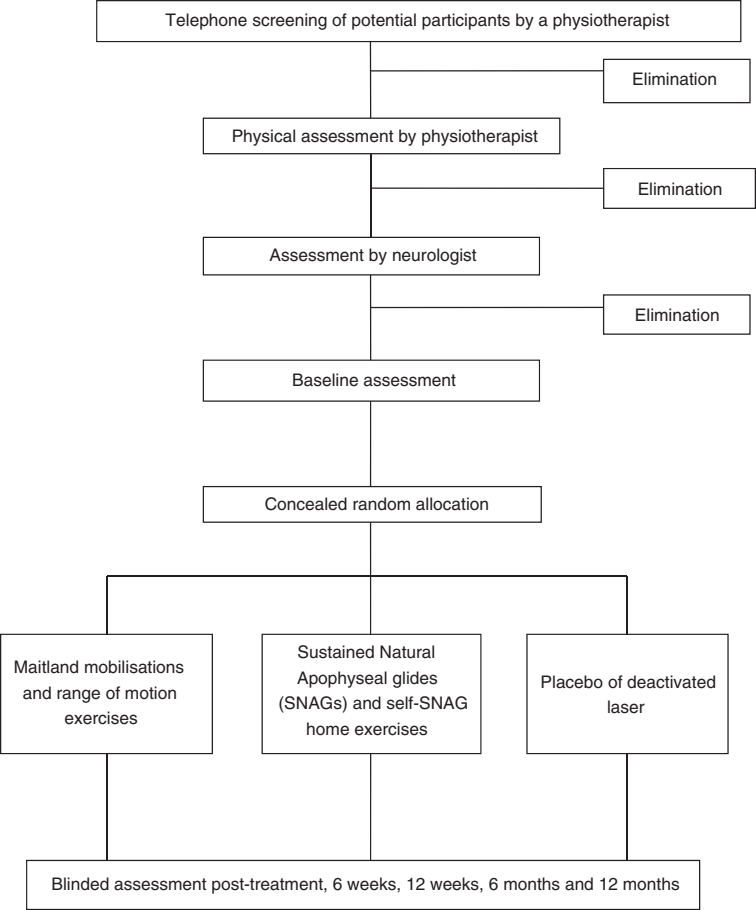

Telephone screening of potential participants by a physiotherapist

Elimination

Physical assessment by physiotherapist

Elimination

Assessment by neurologist

Elimination

Baseline assessment

Concealed random allocation

Maitland mobilisations  
and range of motion  
exercises

Sustained Natural  
Apophyseal glides  
(SNAGs) and self-SNAG  
home exercises

Placebo of deactivated  
laser

Blinded assessment post-treatment, 6 weeks, 12 weeks, 6 months and 12 months
